# Supplementary material for: The development and validation of a clinical prediction model to determine the probability of MODY in patients with young-onset diabetes
Source: PubMed Central journal article supplement — Diabetologia. 2012 Jan 5;55(5):1265–72. doi: 10.1007/s00125-011-2418-8 (PMC3328676; doi:10.1007/s00125-011-2418-8), 2012-01-05
Supplement: 125_2011_2418_MOESM3_ESM.pdf [file 125_2011_2418_MOESM3_ESM.pdf]

### **ESM Methods 3: Prevalence of MODY in patients diagnosed $\leq 35$ y:**

A population-based dataset in Tayside indicated the prevalence of diabetes in patients diagnosed  $\leq 35$ y is 5272 cases per million, comprising 74% Type 1 and 26% Type 2 diabetes (written communication E Pearson & R. McAlpine, 2011). The overall minimum UK prevalence of all MODY is estimated to be 108 cases per million[1] with 84% of cases of MODY being diagnosed  $\leq 35$ y, suggesting 91 cases per million (1.7% of diabetes in this age group). 30% of MODY subjects were insulin treated in a way that they fitted “Type 1” criteria (i.e. 0.51% overall), whereas the remaining 70% did not receive insulin treatment shortly after diagnosis and hence fitted “Type 2” criteria (i.e. 1.19% overall). Given 74% have Type 1 diabetes within this group, prevalences for MODY can be calculated as 0.7% ( $0.51/74$ ) and 4.6% ( $1.19/26$ ) for MODY fitting “Type 1” and “Type 2” criteria, respectively.

### **References:**

[1] Shields BM, Hicks S, Shepherd MH, Colclough K, Hattersley AT, Ellard S (2010) Maturity-onset diabetes of the young (MODY): how many cases are we missing? *Diabetologia* 53: 2504-2508
