# Supplementary material for: The development and validation of a clinical prediction model to determine the probability of MODY in patients with young-onset diabetes
Source: PubMed Central journal article supplement — Diabetologia. 2012 Jan 5;55(5):1265–72. doi: 10.1007/s00125-011-2418-8 (PMC3328676; doi:10.1007/s00125-011-2418-8), 2012-01-05
Supplement: 125_2011_2418_MOESM5_ESM.pdf [file 125_2011_2418_MOESM5_ESM.pdf]

**ESM Results 2: Additional statistical results – Alternative models**

The linear discriminant models showed similar c-statistics to the logistic regression models (T2D v MODY: 0.98 and T1D v MODY: 0.94), but had poorer cross-validated prediction errors (7.6% and 13.8%, respectively). The classification trees had higher total prediction error rates of 9% and 14%, respectively, and were limited as they could only produce a classification rather than a probability for MODY.
