# Supplementary material for: The development and validation of a clinical prediction model to determine the probability of MODY in patients with young-onset diabetes
Source: PubMed Central journal article supplement — Diabetologia. 2012 Jan 5;55(5):1265–72. doi: 10.1007/s00125-011-2418-8 (PMC3328676; doi:10.1007/s00125-011-2418-8), 2012-01-05
Supplement: 125_2011_2418_MOESM6_ESM.pdf [file 125_2011_2418_MOESM6_ESM.pdf]

**ESM Table 1** – Linear discriminant function loadings for the most discriminative criteria for the Type 2 v MODY and Type 1 v MODY models

|                        | Type 2 v MODY | Type 1 v MODY |
|------------------------|---------------|---------------|
| Sex (M=1,F=2)          | 0.43          | 0.49          |
| BMI                    | -0.08         | -             |
| Age Diag (y)           | -0.10         | 0.04          |
| HbA1c (%)              | -0.23         | -0.30         |
| Parent affected        | 0.68          | 1.89          |
| Age (y)                | -             | -0.04         |
| Insulin or OHA treated | -0.22         | -             |
