# Supplementary figures and images for: The development and validation of a clinical prediction model to determine the probability of MODY in patients with young-onset diabetes
Source: PubMed Central journal article supplement — Diabetologia. 2012 Jan 5;55(5):1265–72. doi: 10.1007/s00125-011-2418-8 (PMC3328676; doi:10.1007/s00125-011-2418-8), 2012-01-05

**ESM Figure 1** – Classification Tree for a) Type 2 v MODY comparison and b) Type 1 v MODY comparison

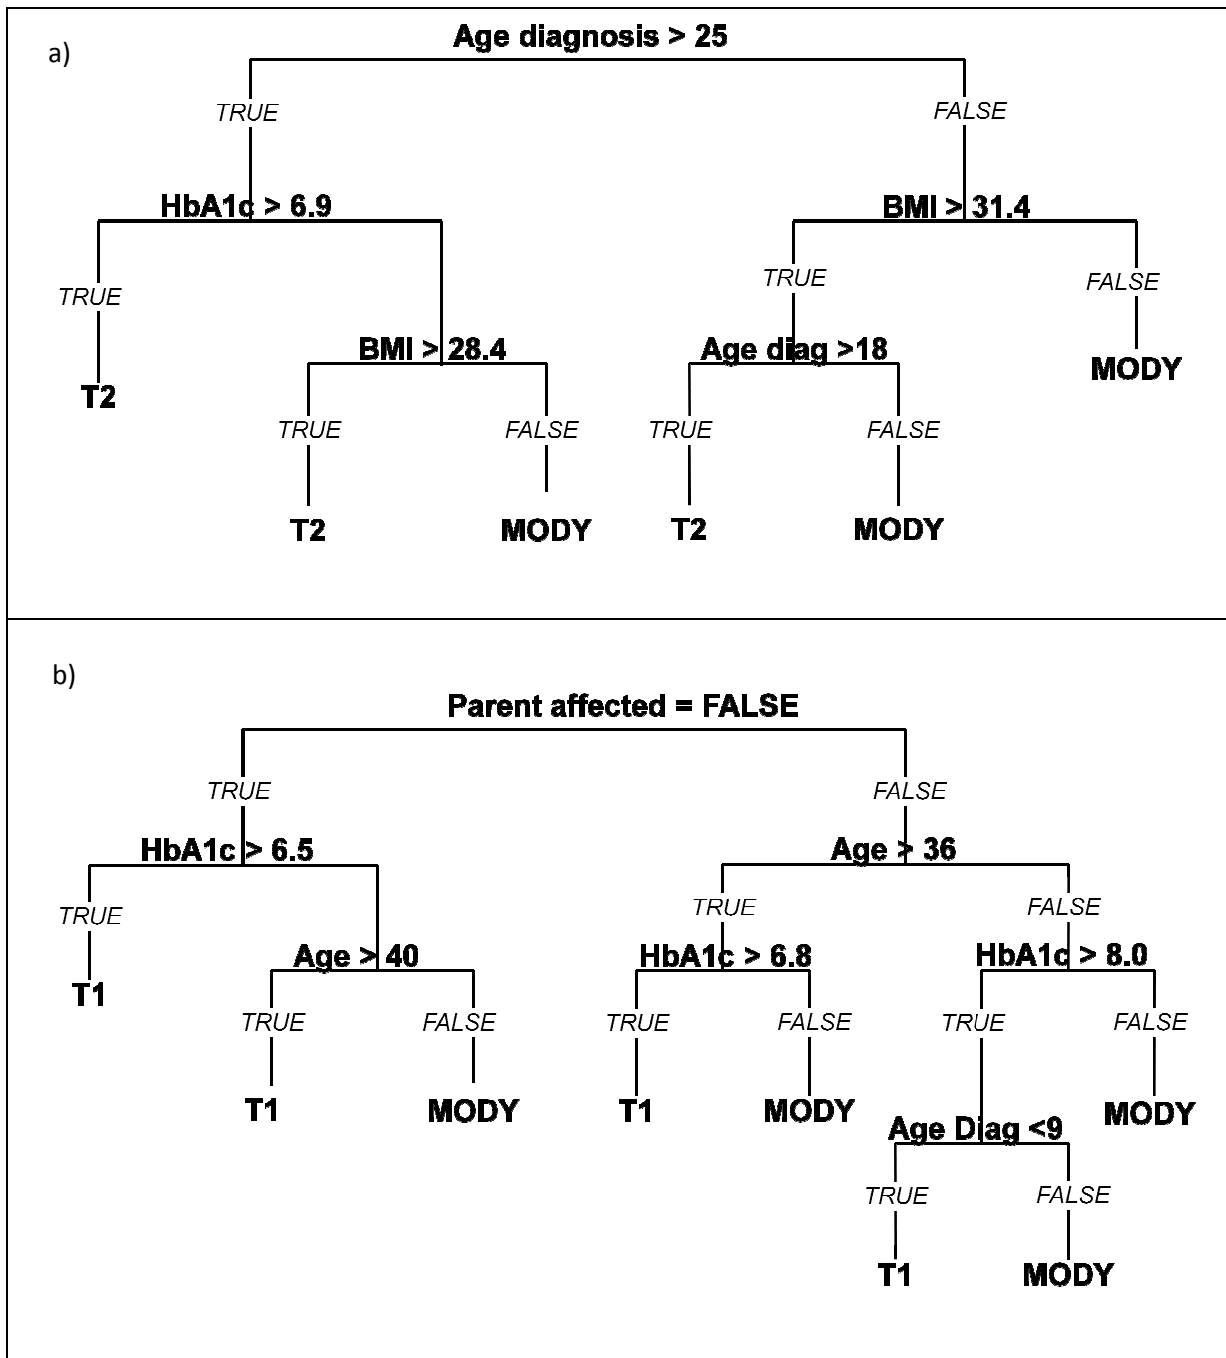

Supplement: 125_2011_2418_MOESM7_ESM.pdf [file 125_2011_2418_MOESM7_ESM.pdf]
